# Supplementary material for: Recontextualizing Cultural Exchanges: The Role of WeChat Subscription Account in Shaping Sino-U.S. Digital Migration Discourse
Source: Research Square preprint supplement (doi:10.21203/rs.3.rs-6663147/v1), 2025-06-25
Supplement: Supplementary file 1 [file f5431a30e975968d54374168.docx]

**Appendix I**

| **Number** | **Article Title** | **Publication Date** | **Number of Views** | **WeChat Subscription Account** | **Account Type** |
| --- | --- | --- | --- | --- | --- |
| 1 | 中美网民历史性联欢，小红书的泼天流量能火多久? Historic Online Gathering of Chinese and American Netizens, How Long Can Xiaohongshu's Explosive Traffic Last? | 2025/1/17 12:05 | Over 100,000 | 三联生活周刊 Sanlian Life Weekly | Sanlian Life Weekly is a comprehensive news and cultural weekly published by the Life, Reading, and New Knowledge Publishing House, a subsidiary of the China Publishing Group. |
| 2 | 在美国，小红书红了 Xiaohongshu Is Getting Popular in the U.S. | 2025/1/17 17:46 | Over 100,000 | 新华社 Xinhua News Agency | Official account of Xinhua News Agency. |
| 3 | 洋悟运动，中美老百姓在小红书疯狂对账 The Global "Awakening" Movement, Chinese and American Citizens are Reconciling on Xiaohongshu | 2025/1/15 23:59 | Over 100,000 | 远方青木 Yuanfang Qingmu | Private company account. |
| 4 | “美国人开眼了，多年反华宣传破功!” "Americans Are Awakening, Years of Anti-China Propaganda Have Failed!" | 2025/1/15 22:23 | Over 100,000 | 观察者网  Guancha Syndicate | Private company account. |
| 5 | 美国网友涌入“小红书”:是时候开眼看中国了 American Netizens Flood Xiaohongshu: Time to Open Eyes to China | 2025/1/17 9:00 | Over 100,000 | 央视新闻 CCTV News | Owned by the China Central Television (CCTV), the main platform for major news, breaking events, and important reports. |
| 7 | 美网民涌入小红书后，外媒发现又一现象! After American Netizens Flooded Xiaohongshu, Foreign Media Discovered Another Phenomenon! | 2025/1/16 20:58 | Over 100,000 | 环球时报 Global Times | Owned by the Global Times, Ltd. |
| 8 | 小红书被美国TikTok难民攻占，就，挺突然的 Xiaohongshu is Taken Over by TikTok Refugees from the U.S., Quite Unexpected | 2025/1/15 14:19 | Over 100,000 | 九万里 Jiu Wan Li | Personal account. |
| 9 | 小红书上，正发生一场中美人民的集体觉醒 A Collective Awakening of the Chinese and American People is Happening on Xiaohongshu | 2025/1/17 22:26 | Over 100,000 | 王左中右 Wang Zuo Zhong You | Private company account. |
| 10 | 一“对账”，咋就“悟”了 One "Reconciliation", How Did They "Awaken"? | 2025/1/17 7:31 | Over 100,000 | 浙江宣传 Zhejiang Publicity | Official public platform of the Zhejiang Provincial Party Committee's Propaganda Department. |
| 11 | 中美网友“大对账”，华盛顿开始有压力了 Chinese and American Netizens "Great Reconciliation", Washington is Starting to Feel the Pressure | 2025/1/17 7:03 | Over 100,000 | 胡锡进观察 Hu Xijin's Observation | "Hu Xijin Observation" is a WeChat subscription account hosted by Hu Xijin, a well-known media personality in China. Hu Xijin was the former editor-in-chief of the Global Times and is famous for his unique commentary style and in-depth analysis of current events. |
| 12 | 笑死！中美网民开始在小红书对账了，结果两边都震惊了… Hilarious! Chinese and American Netizens Are Reconciling on Xiaohongshu, and Both Sides Are Shocked… | 2025/1/15 22:04 | Over 100,000 | 北美留学生观察 North American Student Observation | Private company account. |
| 13 | 为了破坏中美民众的小红书交流，他们使出一条毒计！ To Disrupt the Communication Between Chinese and American People on Xiaohongshu, They Used a Toxic Strategy! | 2025/1/22 20:11 | Over 100,000 | 胡锡进观察 Hu Xijin's Observation | "Hu Xijin Observation" is a WeChat subscription account hosted by Hu Xijin, a well-known media personality in China. Hu Xijin was the former editor-in-chief of the Global Times and is famous for his unique commentary style and in-depth analysis of current events. |
| 14 | "中美网民联手，完成了对美政府的欢乐嘲弄" "Chinese and American Netizens Joined Forces to Mock the U.S. Government" | 2025/1/18 11:23 | Over 100,000 | 观察者网 Guancha Syndicate | Private company account. |
| 15 | 中美网友对完账，两边全疯了… After the Reconciliation, Both Sides Went Crazy… | 2025/1/21 8:01 | Over 100,000 | 大碗Pro Da Wan Pro | Private company account. |
| 16 | 美媒对小红书的三篇报道，太逗了！ Three Hilarious Reports by U.S. Media on Xiaohongshu! | 2025/1/17 7:38 | Over 100,000 | 环球时报 Global Times | Owned by the Global Times, Ltd. |
| 17 | 反击美国政府！大量美国网民涌入中国社交APP Counterattack on the U.S. Government! Large Numbers of American Netizens Flood Into Chinese Social Media Apps | 2025/1/14 13:47 | Over 100,000 | 环球时报 Global Times | Owned by the Global Times, Ltd. |
| 18 | 别呀！Tiktok之后，美国想禁小红书了！ Don’t! After TikTok, the U.S. Wants to Ban Xiaohongshu! | 2025/1/19 1:45 | Over 100,000 | 北美省钱快报 North America Savings Express | Private company account. |
| 19 | 小红书对账后，美国人的信仰崩了！ After the Reconciliation on Xiaohongshu, American Beliefs Are Crumbling! | 2025/1/18 21:32 | Over 100,000 | 牲产队 Sheng Chan Team | Private company account. |
| 20 | 中美网民在小红书接头的48小时 48 Hours of Chinese and American Netizens Connecting on Xiaohongshu | 2025/1/15 17:13 | 81,000 | 那个NG  That NG | Private company account. |
| 21 | 美国人挤爆小红书了，犹太资本的天塌了! Americans Flood Xiaohongshu, the Sky Falls for Jewish Capital! | 2025/1/15 13:16 | 79,000 | 牲产队 Sheng Chan Team | Private company account. |
| 22 | 中美网友，在小红书“对账” Chinese and American Netizens Reconciling on Xiaohongshu | 2025/1/16 7:41 | 61,000 | 平原公子  Pingyuan Gongzi | Personal account. |
| 23 | 哈佛教授连夜「逃难」小红书，中美民间外交真火了 Harvard Professor Escapes to Xiaohongshu Overnight, Chinese and American People's Diplomacy Is on Fire | 2025/1/17 13:42 | 61,000 | 谷雨星球 Gu Yu Planet | Private company account. |
